# Supplementary material for: Hydrogen-assisted CO dissociation on the Co(211) stepped surface
Source: Royal Society of Chemistry journal article supplement (doi:10.1039/c2cy00396a), 2012-01-01
Supplement: c2cy00396a.pdf [file c2cy00396a.pdf]

# Supporting information for: Hydrogen-assisted CO dissociation on a Co step site

Pieter van Helden,<sup>\*,†</sup> Jan-Albert van den Berg,<sup>†</sup> and Ionel M. Ciobîcă<sup>‡</sup>

*Sasol Technology Pty (Ltd.), P.O. Box 1, Sasolburg 1947, South Africa, and Sasol Technology Netherlands B.V., Eindhoven University of Technology, P.O. Box 513, 5600 MB Eindhoven, The Netherlands*

E-mail: pieter.vanhelden@sasol.com

## Computational details

All the calculations in this study were performed using the Vienna ab initio simulation package (VASP).<sup>1,2</sup> This code uses periodic DFT with a plane wave basis set and pseudopotentials. The generalized gradient approximation (GGA) with the Perdew and Wang exchange-correlation functional<sup>3</sup> was used. The electron distribution at the Fermi level was modelled by Methfessel and Paxton smearing<sup>4</sup> with  $\sigma = 0.2$  eV. A 10 layer slab was used for the Co(211) surface. Ultrasoft pseudopotentials were used in all calculations. The surface is represented by using p(1×2) surface unitcell. The optimized model has a 10 Å vacuum layer between the two surfaces of the slab. Apart from the constrained bottom three layers of the slab, all the atoms in the configurations were allowed to relax. The k-point sampling was generated by following the Monkhorst-Pack<sup>5</sup> procedure

---

\*To whom correspondence should be addressed

<sup>†</sup>Sasol Technology Pty (Ltd.), P.O. Box 1, Sasolburg 1947, South Africa

<sup>‡</sup>Sasol Technology Netherlands B.V., Eindhoven University of Technology, P.O. Box 513, 5600 MB Eindhoven, The Netherlands

with a  $6 \times 7 \times 1$  mesh for the Co(211) surface. The plane wave basis set cutoff energy was set to 400 eV.

By fitting the energies of a series of bulk Co cells to the Birch-Murnaghan equation of state<sup>6,7</sup> we obtained the equilibrium lattice constant and bulk modulus. For bulk FCC-Co a lattice parameter of 3.538 Å was obtained. This structure has a bulk modulus of 202 GPa and a magnetic moment of 1.67  $\mu_B$  per Co atom. These values are in good agreement with the experimental values of bulk FCC-Co (3.550 Å,<sup>8</sup> 191 GPa<sup>9</sup> and 1.70  $\mu_B$ <sup>10</sup> respectively).

The adsorption of the considered species was done on a single side of the Co surface slabs. Dipole corrections have been applied in the calculations to avoid artificial dipole effects. The VASP implementation of the nudged elastic band (NEB) method<sup>11</sup> was used to locate transition states.

## Partial Hessian vibrational analysis

Partial Hessian vibrational analysis was performed on the calculated structures. Perturbations of 0.01 Å in Cartesian space were used. From these calculations we obtained the vibrational frequencies ( $\nu_i$ ) within the harmonic approximation. From these frequencies the vibrational zero-point energy was calculated:

$$E_{ZPVE} = \frac{1}{2} \sum_i h\nu_i \quad (1)$$

The resulting zero-point vibrational corrections were included in the reported energies. The vibrational frequencies of structures in the direct CO dissociation pathways on Co(211) can be seen in Table 2 and Table 3. The frequencies for the considered hydrogen-assisted pathways can be seen in Table 4 and Table 5.

## Simple kinetic analysis

Assuming that the reactions of direct CO dissociation and the hydrogen-assisted pathways are localised at the step sites, and that these reactions are non-reversible and rate limiting in the Fischer-Tropsch synthesis (FTS) reaction, it is possible to set up simple rate equation estimates using the calculated barriers and vibrational frequencies of non-interacting adsorbed H and CO. The values for the reaction temperature and surface coverages of hydrogen and CO were obtained from the experimental SSITKA work by Den Breejen et al.<sup>12</sup> for Co particles with diameters larger than 6 nm.

For direct CO dissociation the FTS turnover frequency (TOF) can be estimated by:

$$r_{CO} = \frac{k_B T}{h} \frac{q_{TS}}{q_{CO}} e^{\frac{-E_a}{RT}} \theta_{CO} \quad (2)$$

with  $k_B$  being the Boltzmann constant,  $T$  the reaction temperature,  $h$  the Planck constant,  $q_{TS}$  the vibrational partition function of the transition state,  $q_{CO}$  the vibrational partition function of adsorbed CO,  $E_a$  the overall activation energy,  $R$  the molar gas constant and  $\theta_{CO}$  the coverage of adsorbed CO.

Similarly the FTS TOF proceeding via the HCO pathway can be estimated by

$$r_{HCO} = \frac{k_B T}{h} \frac{q_{TS}}{q_{CO} q_H} e^{\frac{-E_a}{RT}} \theta_{CO} \theta_H \quad (3)$$

with  $q_H$  the vibrational partition function of adsorbed H and  $\theta_H$  the coverage of adsorbed hydrogen.

Using the overall barrier value of 207 kJ.mol<sup>-1</sup> proposed in literature for the Co(0001) surface<sup>13</sup> we can compare the rate of hydrogen-assisted CO dissociation on the Co(0001) surface to that of the Co(211) surface. The FTS TOF proceeding via the HCO pathway on the Co(0001) surface can be estimated by

$$r_{0001} = \frac{k_B T}{h} \frac{q_{TS}}{q_{CO} q_H} e^{\frac{-E_a}{RT}} \theta_{CO} \theta_H \quad (4)$$

Since the vibrational frequencies of the species shown in literature are not given, we use a partition

function ratio of 1 which reduces the equation to:

$$r_{0001} = \frac{k_B T}{h} e^{\frac{-E_a}{RT}} \theta_{CO} \theta_H \quad (5)$$

Using the average experimental coverage estimates of  $\theta_{CO} = 0.51$  ML and  $\theta_H = 0.11$  ML,<sup>12</sup> the estimated FTS rates were calculated at both 210 °C and 220 °C. The resulting rate estimations, as well as the approximate experimental TOF, can be seen in Table 6.

Table 1: Frequencies of adsorbed H on Co(111)

| Configuration | Frequencies [cm <sup>-1</sup> ] |
|---------------|---------------------------------|
| H             | 1178, 861, 826                  |

Table 2: Frequencies of structures in the direct CO dissociation Pathway A on Co(211)

| Configuration | Frequencies [cm <sup>-1</sup> ]       |
|---------------|---------------------------------------|
| CO            | 1236, 394, 360, 308, 200, 163         |
| CO TS         | 528, 482, 438, 308, 303, 359 <i>i</i> |
| (C + O)       | 679, 603, 486, 384, 295, 278          |

Table 3: Frequencies of structures in the direct CO dissociation Pathway B on Co(211)

| Configuration | Frequencies [cm <sup>-1</sup> ]       |
|---------------|---------------------------------------|
| CO            | 1518, 350, 246, 195, 164, 100         |
| CO TS         | 496, 464, 405, 287, 244, 507 <i>i</i> |
| (C + O)       | 644, 560, 468, 386, 318, 128          |

## References

- (1) Kresse, G.; Hafner, J. *Phys. Rev. B* **1993**, *47*, 558.
- (2) Kresse, G.; Furthmüller, J. *Phys. Rev. B* **1996**, *54*, 11169.
- (3) Perdew, J. P.; Wang, Y. *Phys. Rev. B* **1992**, *45*, 13244.
- (4) Methfessel, M.; Paxton, A. T. *Phys. Rev. B* **1989**, *40*, 3616.
- (5) Monkhorst, H. J.; Pack, J. D. *Phys. Rev. B* **1976**, *13*, 5188.
- (6) Murnaghan, F. D. *Proc. Nat. Acad. Sci.* **1944**, *30*, 244.
- (7) Birch, F. *Phys. Rev.* **1947**, *71*, 809.
- (8) Ashcroft, N. W.; Mermin, N. D. *Solid State Physics*; Holt, Rinehart and Winston: New York, 1976.
- (9) Mehl, M. J.; Papaconstantopoulos, D. A. *Phys. Rev. B* **1996**, *54*, 4519.
- (10) West, A. R. *Basic Solid State Chemistry*, 2nd ed.; Wiley & Sons Ltd.: New York, 1999.
- (11) Jónsson, H.; Mills, G.; Jacobsen, K. W. In *Classical and Quantum Dynamics in Condensed Phase Simulations*; Berne, B. J., Ciccotti, G., Coker, D. F., Eds.; World Scientific: Singapore, 1998; p 385.
- (12) den Breejen, J. P.; Radstake, P. B.; Bezemer, G. L.; Bitter, J. H.; Frøseth, V.; Holmen, A.; de Jong, K. P. *J. Am. Chem. Soc.* **2009**, *131*, 7197.
- (13) Zhuo, M.; Tan, K. F.; Borgna, A.; Saeys, M. *J. Phys. Chem. C* **2009**, *113*, 8357.

Table 4: Frequencies of structures in the HCO hydrogen-assisted pathway on Co(211)

| Configuration | Frequencies [ $\text{cm}^{-1}$ ]                       |
|---------------|--------------------------------------------------------|
| TS: CO + H    | 1850, 1190, 550, 402, 381, 295, 280, 168, 664 <i>i</i> |
| HCO           | 2173, 1361, 1006, 689, 449, 339, 330, 240, 201         |
| TS: HCO diss. | 2938, 904, 697, 482, 457, 356, 307, 95, 490 <i>i</i>   |
| (CH + O)      | 2904, 781, 771, 502, 478, 400, 372, 287, 254           |

Table 5: Frequencies of structures in the COH hydrogen-assisted pathway on Co(211)

| Configuration | Frequencies [ $\text{cm}^{-1}$ ]                        |
|---------------|---------------------------------------------------------|
| TS: CO + H    | 1244, 1071, 588, 341, 329, 264, 252, 199, 1474 <i>i</i> |
| COH           | 3485, 1198, 978, 480, 411, 350, 270, 170, 145           |
| TS: COH diss. | 3645, 790, 583, 526, 500, 361, 223, 125, 346 <i>i</i>   |
| (C + OH)      | 3750, 833, 730, 588, 586, 457, 309, 287, 50             |

Table 6: Estimated FTS turnover frequencies (TOF) for the direct CO and HCO pathways compared to the average experimental TOF for Co particles with diameters larger than 6 nm.<sup>12</sup>

| Temperature [ $^{\circ}\text{C}$ ] | $r_{\text{CO}}$ [ $\text{s}^{-1}$ ] | $r_{\text{HCO}}$ [ $\text{s}^{-1}$ ] | $r_{0001}$ [ $\text{s}^{-1}$ ] | Expt. <sup>12</sup> [ $\text{s}^{-1}$ ] |
|------------------------------------|-------------------------------------|--------------------------------------|--------------------------------|-----------------------------------------|
| 210                                | 0.0007                              | 0.0295                               | $2.36 \times 10^{-11}$         | $\pm 0.01$                              |
| 220                                | 0.0014                              | 0.0557                               | $6.85 \times 10^{-11}$         | $\pm 0.01$                              |
